# Supplementary material
Source: HighWire-hosted journal article supplement (http://molpharm.aspetjournals.org/highwire/filestream/76908/field_highwire_adjunct_files/2/SI_fig_3.pdf)
Supplement: SI_fig_3.pdf [file SI_fig_3.pdf]

## Glycine hinges with opposing actions at the acetylcholine receptor-channel transmitter binding site

Prasad Purohit and Anthony Auerbach

Department of Physiology and Biophysics, SUNY at Buffalo, Buffalo 14214, USA

**Molecular Pharmacology**

### Supplemental Figure 3

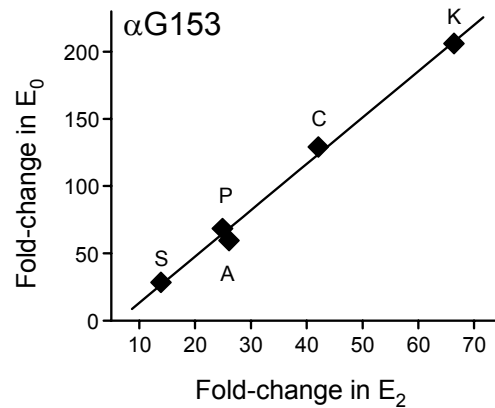

**Supplemental Figure 3.** Correlation between fold-changes in  $E_2$  and  $E_0$  for  $\alpha$ G153 mutants. The fold-changes in  $E_2$  and  $E_0$  are linearly correlated ( $r^2=0.99$ ) suggesting that  $\alpha$ G153 mutations alter diliganded gating by an approximately parallel change  $E_0$ .
